# Supplementary material for: Tertiary amine solvents having switchable hydrophilicity
Source: Royal Society of Chemistry journal article supplement (doi:10.1039/c0gc00806k), 2011-01-01

**SUPPLEMENTARY INFORMATION FOR:**

**Tertiary Amine Solvents having Switchable Hydrophilicity**

**Philip G. Jessop,<sup>a,\*</sup> Lisa Kozycz,<sup>a</sup> Zahra Ghoshouni Rahami,<sup>a</sup> Dylan Schoenmakers,<sup>a</sup>  
Alaina R. Boyd,<sup>a</sup> Dominik Wechsler,<sup>b</sup> and Amy M. Holland<sup>b</sup>**

**Contents:**

Figure S1. <sup>1</sup>H NMR spectrum of polystyrene foam before dissolution in SHS.

Figure S2. <sup>1</sup>H NMR spectrum of dried polystyrene after recovery from the SHS.

Figure S3. <sup>1</sup>H NMR spectrum of dried polystyrene after recovery from the SHS and subsequent passage through a single-screw extruder.

Figure S4. IR spectrum of polystyrene foam before dissolution in the SHS.

Figure S5. IR spectrum of dried polystyrene after recovery from the SHS.

Figure S6. IR spectrum of dried polystyrene after recovery from the SHS and subsequent passage through a single-screw extruder.

**Figure S1.** <sup>1</sup>H NMR spectrum of polystyrene foam before dissolution in SHS.

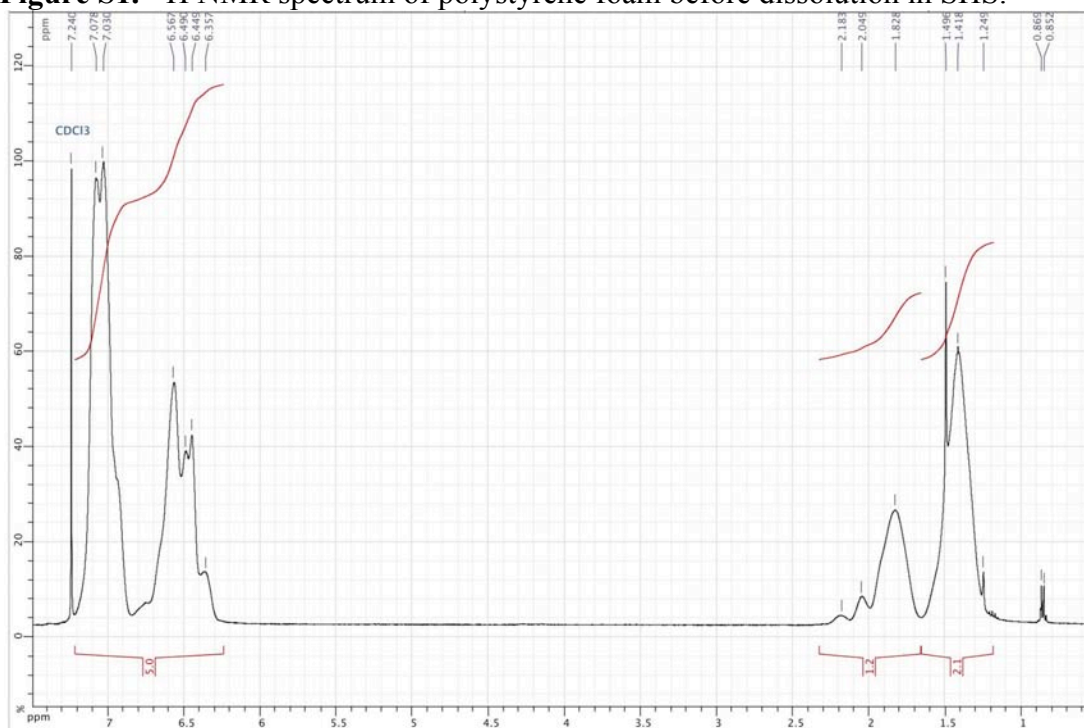

**Figure S2.**  $^1\text{H}$  NMR spectrum of dried polystyrene after recovery from the SHS.

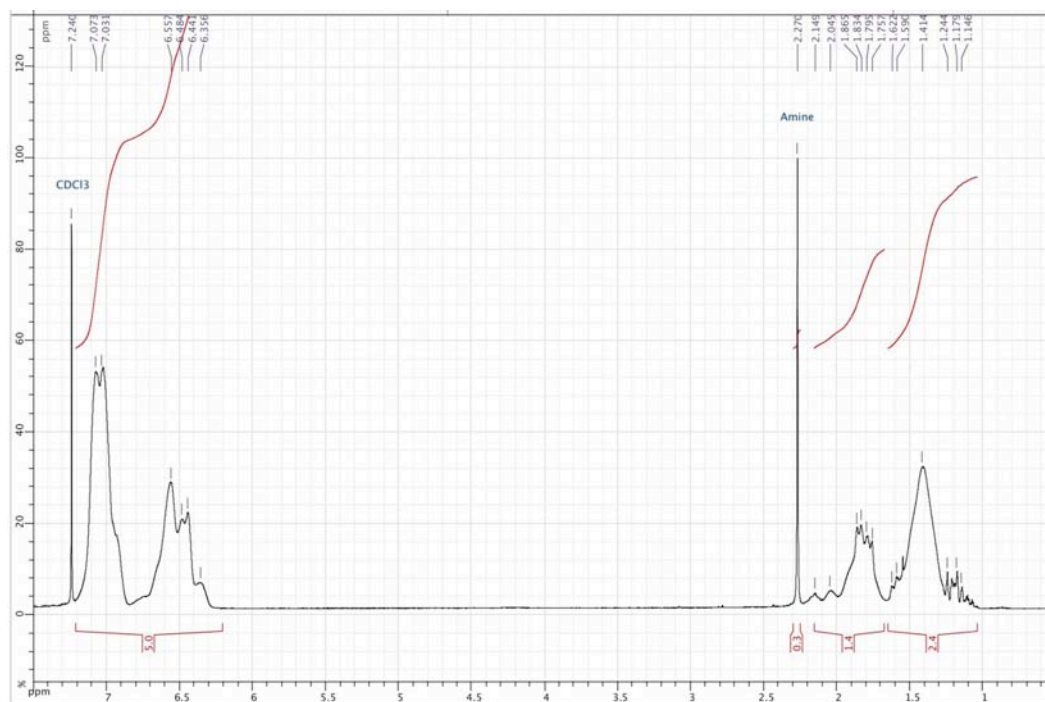

**Figure S3.**  $^1\text{H}$  NMR spectrum of dried polystyrene after recovery from the SHS and subsequent passage through a single-screw extruder.

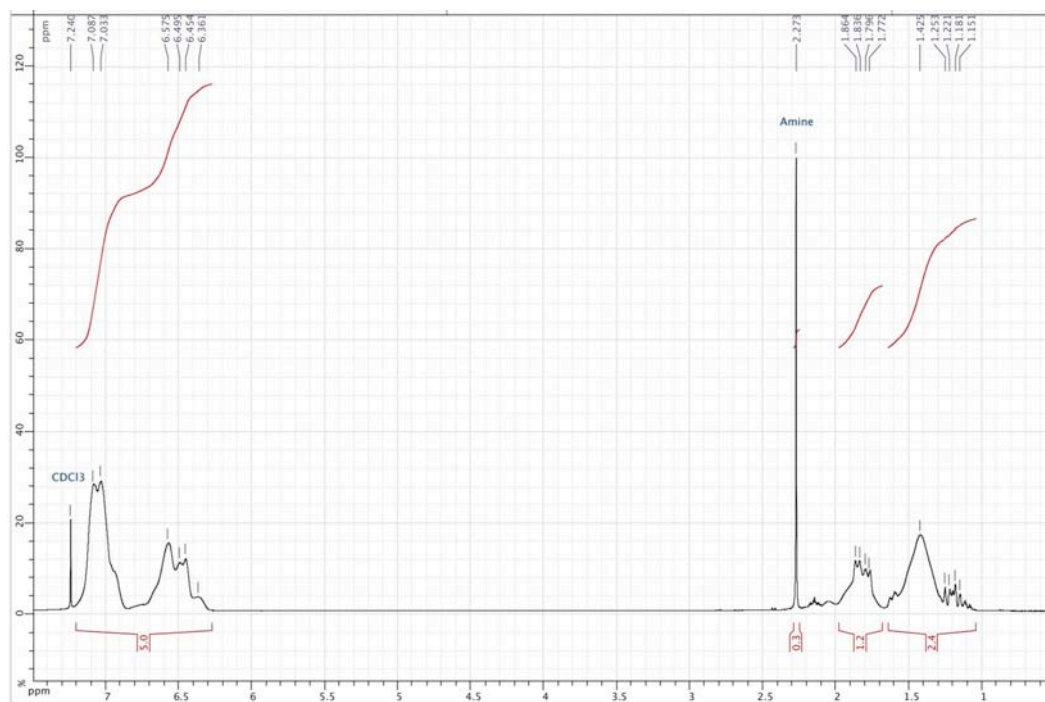

**Figure S4.** IR spectrum of polystyrene foam before dissolution in the SHS.

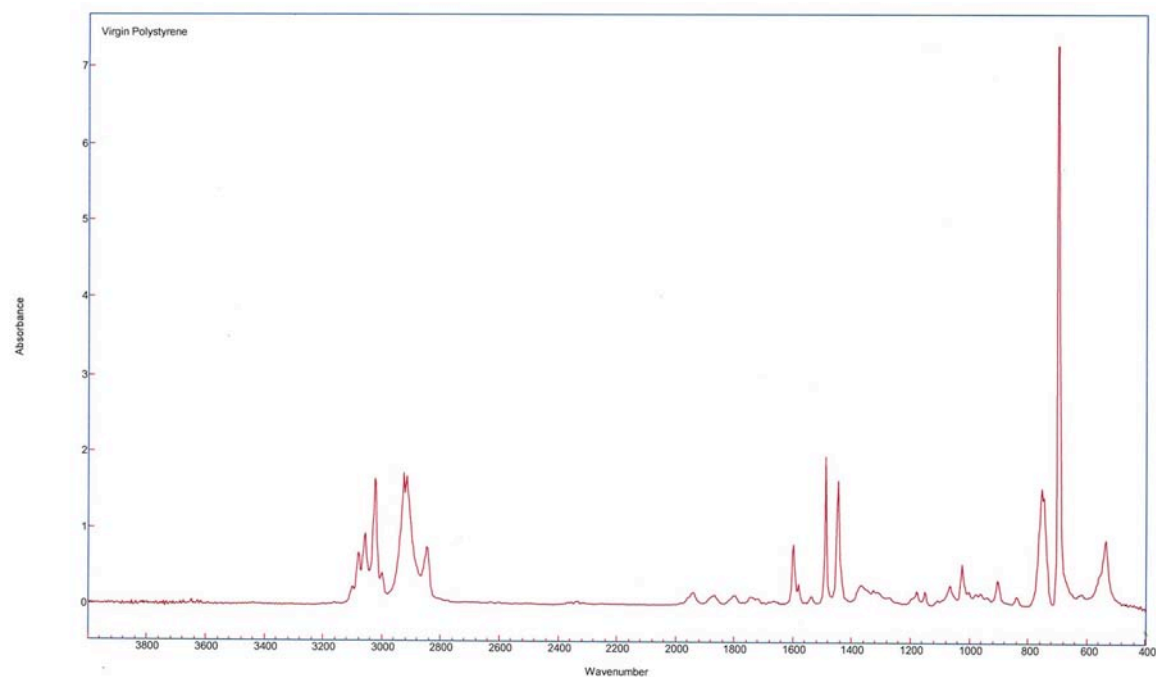

**Figure S5.** IR spectrum of dried polystyrene after recovery from the SHS.

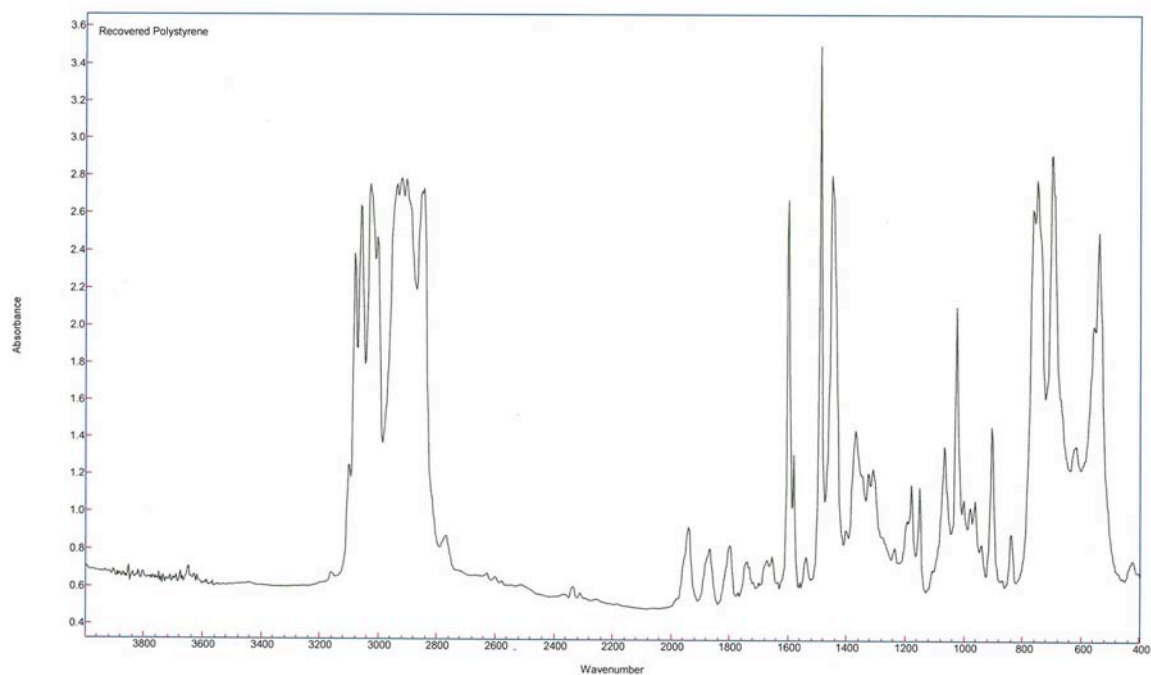

**Figure S6.** IR spectrum of dried polystyrene after recovery from the SHS and subsequent passage through a single-screw extruder.

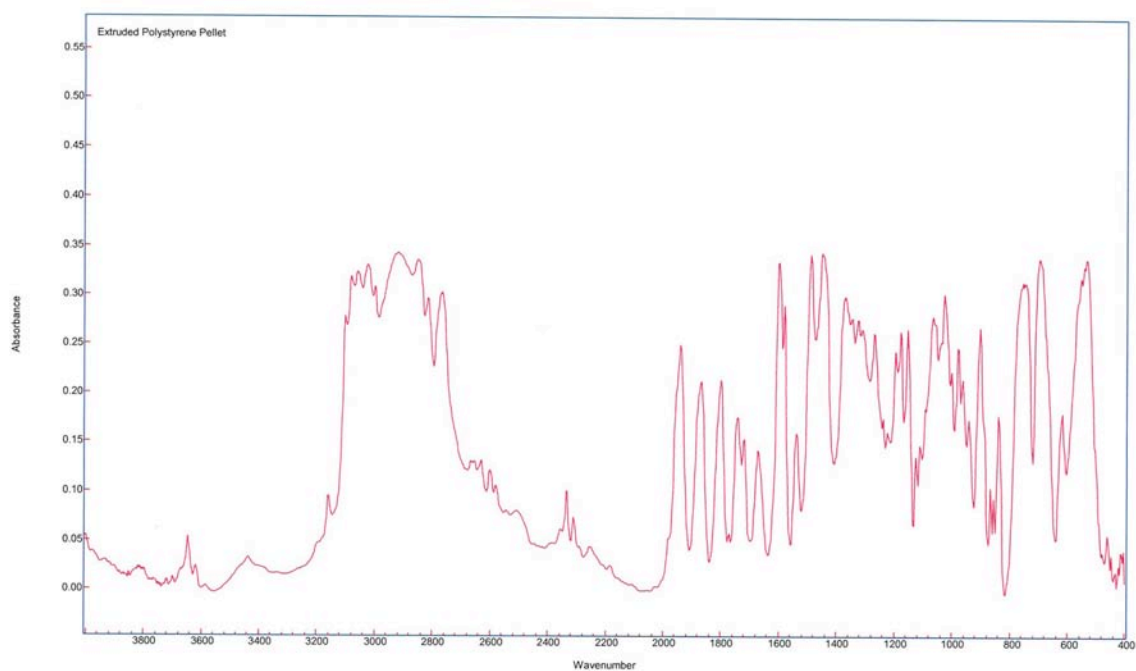

Supplement: C0GC00806K.PDF [file C0GC00806K.PDF]
